# Supplementary material
Source: PubMed Central journal article supplement (PMC3188592)

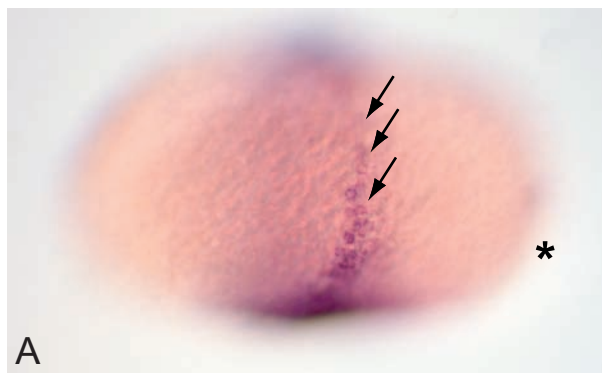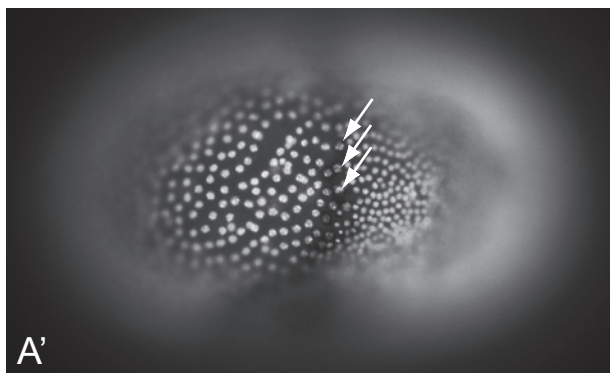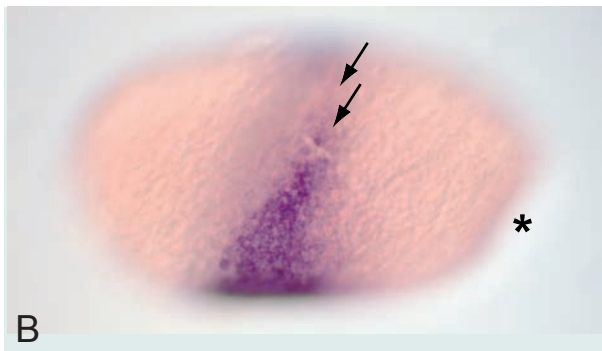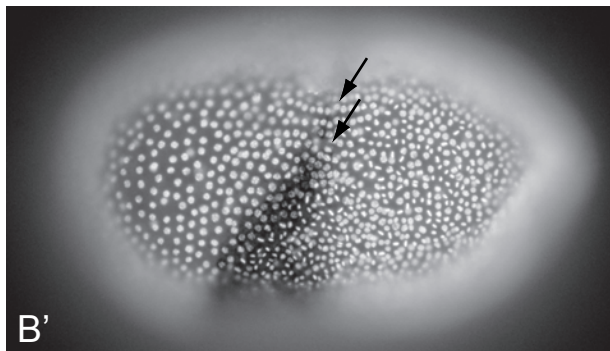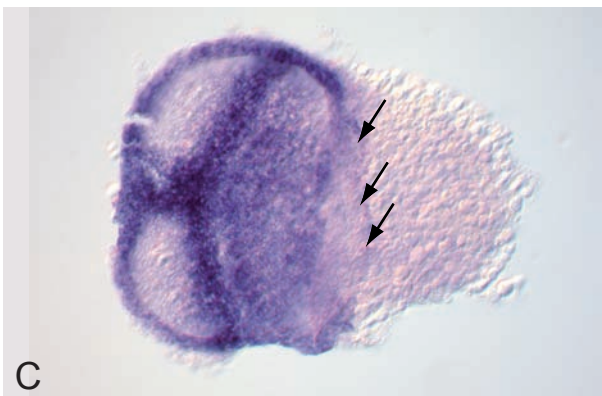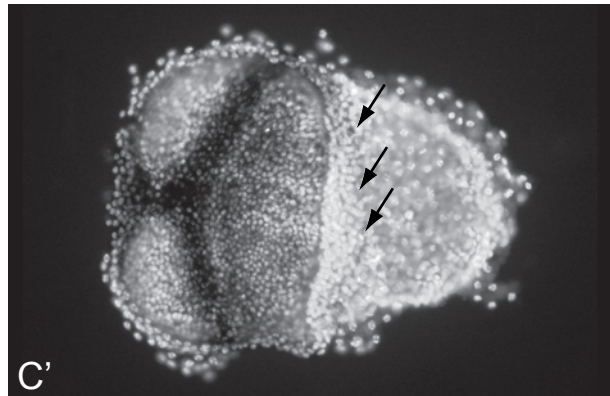

Supplement: supp_138.13.2793_DEV063644FigS1.pdf [file supp_138.13.2793_DEV063644FigS1.pdf]

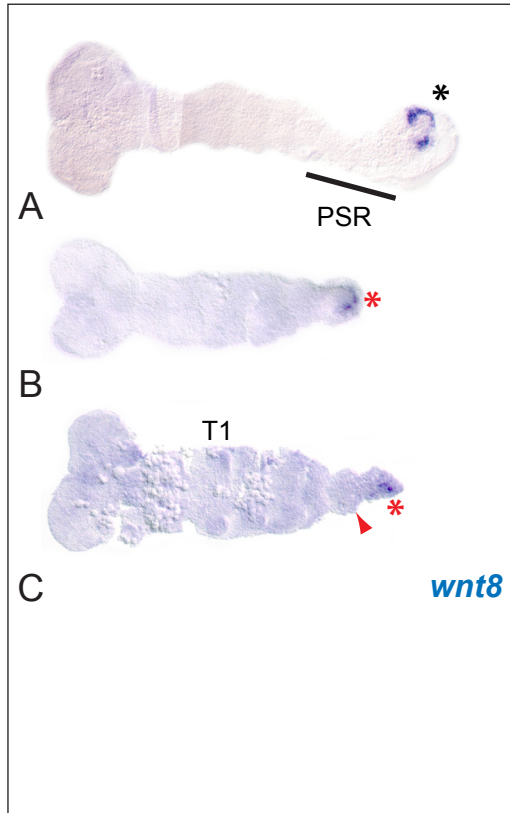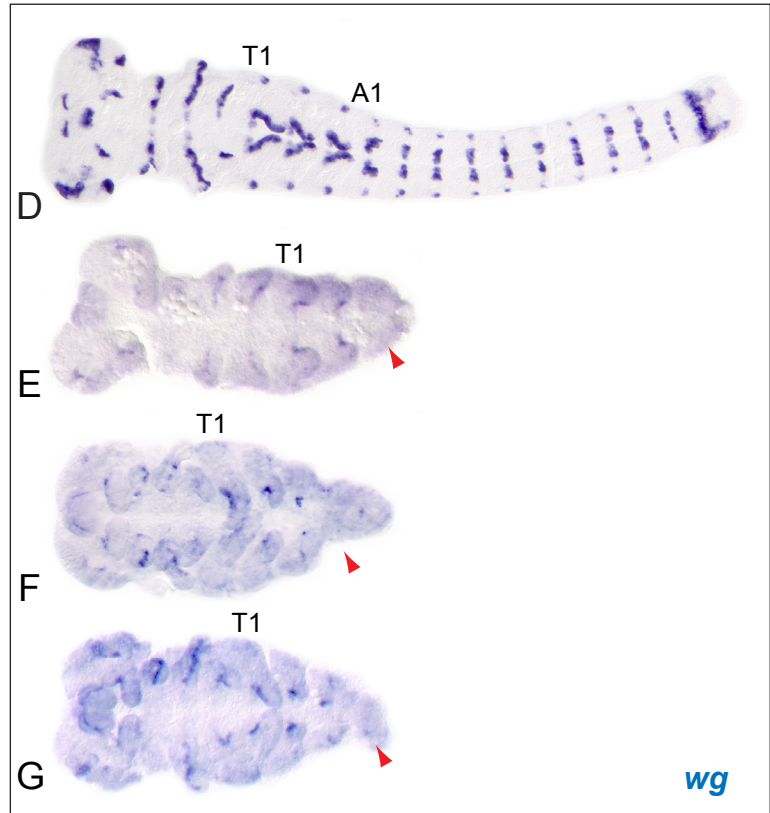

Supplement: supp_138.13.2793_DEV063644FigS2.pdf [file supp_138.13.2793_DEV063644FigS2.pdf]

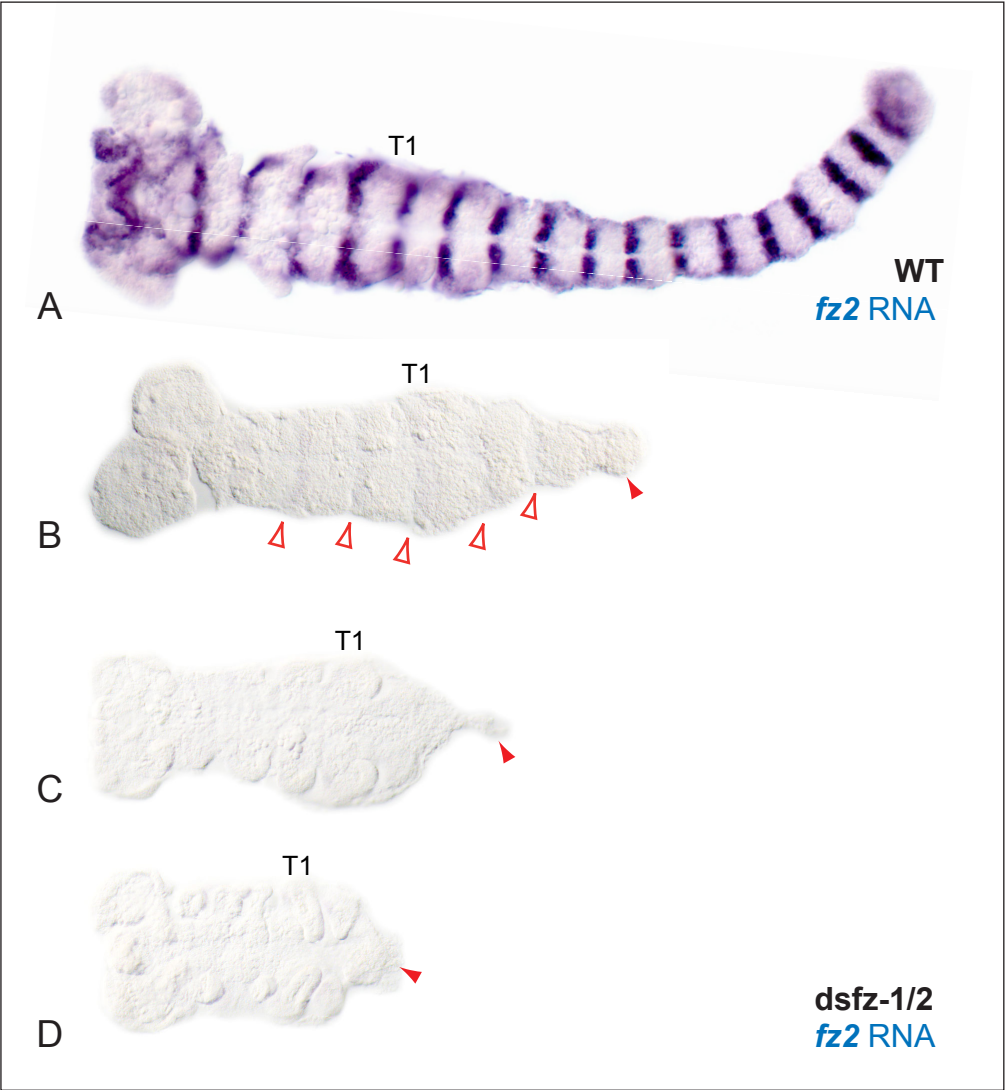

Supplement: supp_138.13.2793_DEV063644FigS3.pdf [file supp_138.13.2793_DEV063644FigS3.pdf]

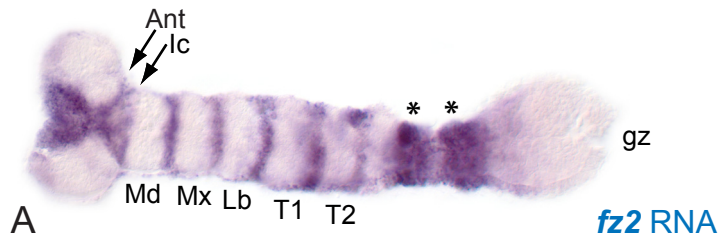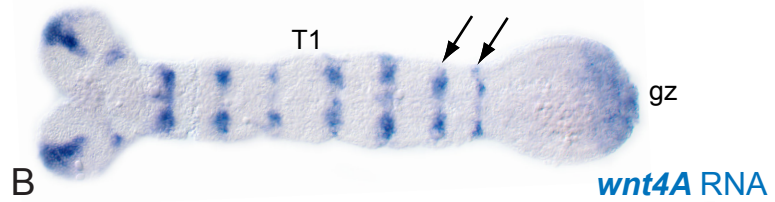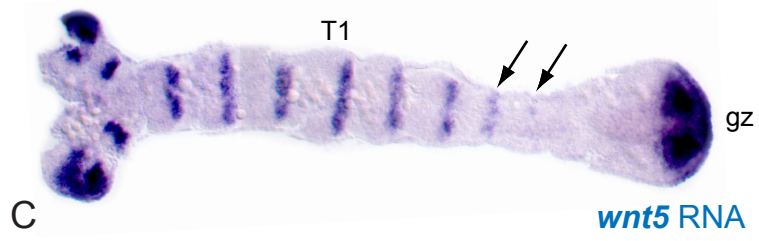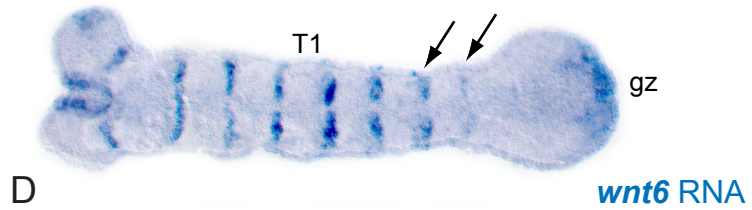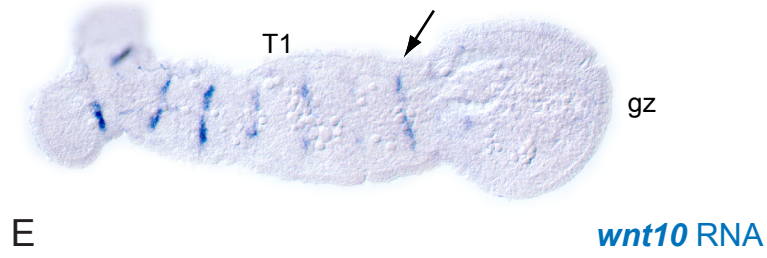

Supplement: supp_138.13.2793_DEV063644FigS5.pdf [file supp_138.13.2793_DEV063644FigS5.pdf]
